# Supplementary material
Source: PubMed Central journal article supplement (PMC555986)
Supplement: pnas_102_14_5056__6.pdf [file pnas_102_14_5056__6.pdf]

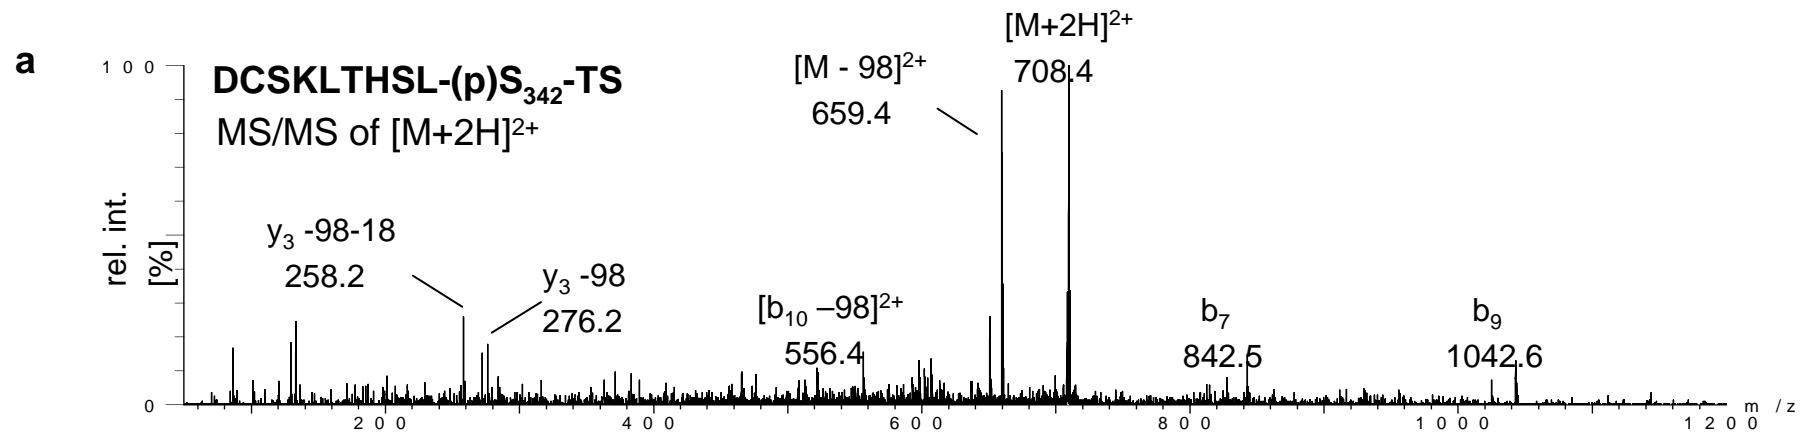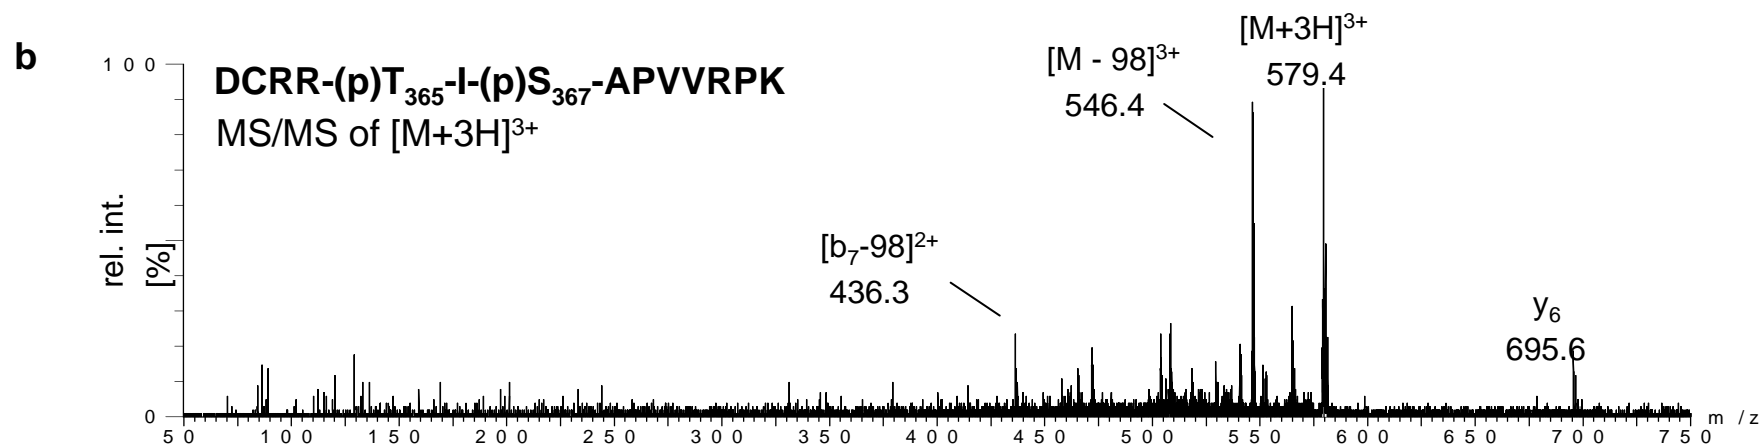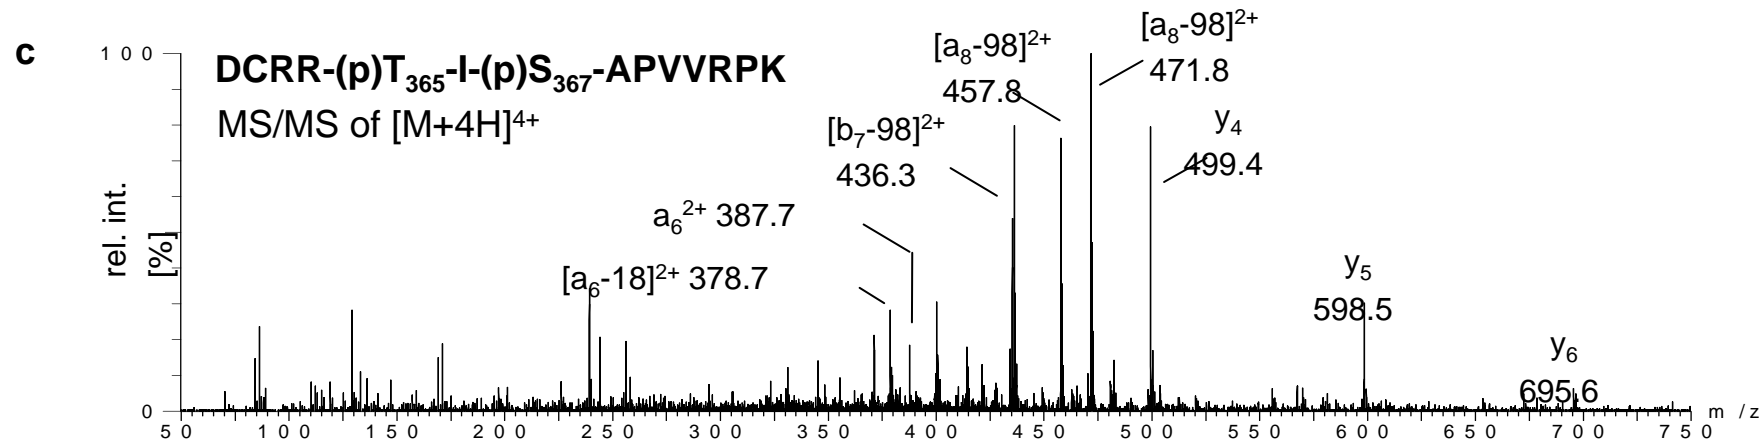

d

```
                               342                               365 367                               403
                               ▼                               ▼▼                               ▼
human                          DCSKLTHSLS TSDITAIP.. .....EK. ENEGNDVPDC RRTISAPVVR PKDAYIKKEN SKLFDPCNSV EFLDLAHSSE SQETISSMGE QLDNLSEQRT
Rattus norvegicus             DCSKLTHSLS TSNITAIP.. .....EKK DNEGIDVPDC RRTISAPVVR PKDGYLKEEK PR.FDPCNSV EFLDLAHGSE SQEIISSTRE QTDIFSEQKT
Mus musculus                  DCSKLTHSLS TSNITAIP.. .....EKK DNEGIDVPDC RRTISAPVVR PKDGYLKEEK PR.FDPCNSV GFLDLAHSSE SQEIISARE QTDIFSEQKA
Danio rerio                   DCPRPVHSIS VPDIPACSSR PERDEDEEEE DDDGIDMPDC LRTVSDPVVL PSHRVSRNI. ....PSSSA SS...SKGKG PSQIHHHLQE TSEGDSQDTL
Gallus gallus                 DFPRLIHSSS TPTLPGKVS. ....SQM IVDGLDIPDC RRTVSAPMVG VQVPECRSL. ....VPFL EPLDLAANSK A.....FSE STDLLTFKA
Xenopus laevis                DCPKLTHSLS LSNIDTMQ.. .....NEN SDEGIDVPDC RRTISAPVGP PKDMYVVENK SH.VDPCGSI ESLDLARECE RRDSLLSFTE H.....KKEE
```
