# Supplementary material
Source: PubMed Central journal article supplement (PMC555986)

**a**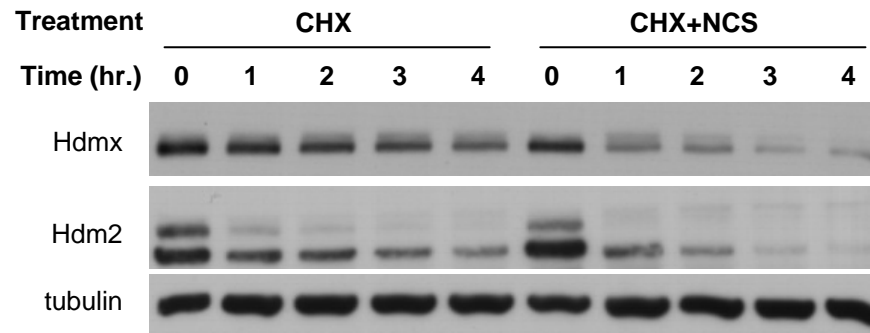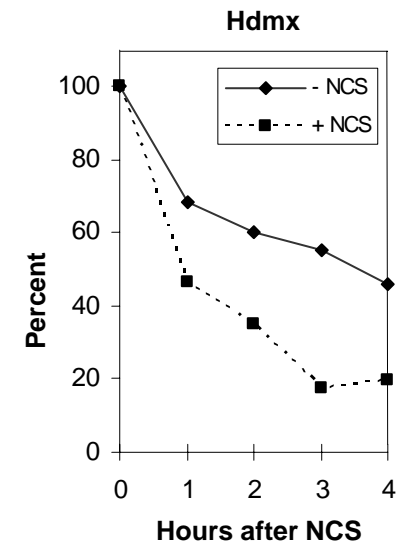**b**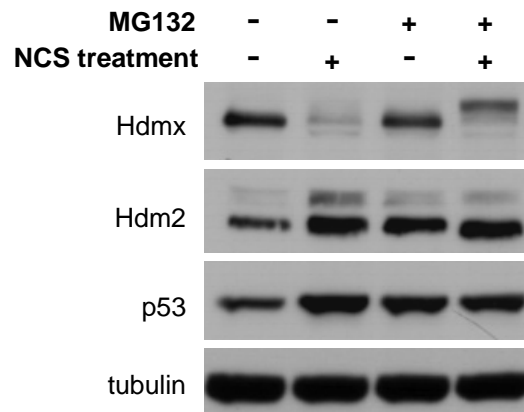

**C**

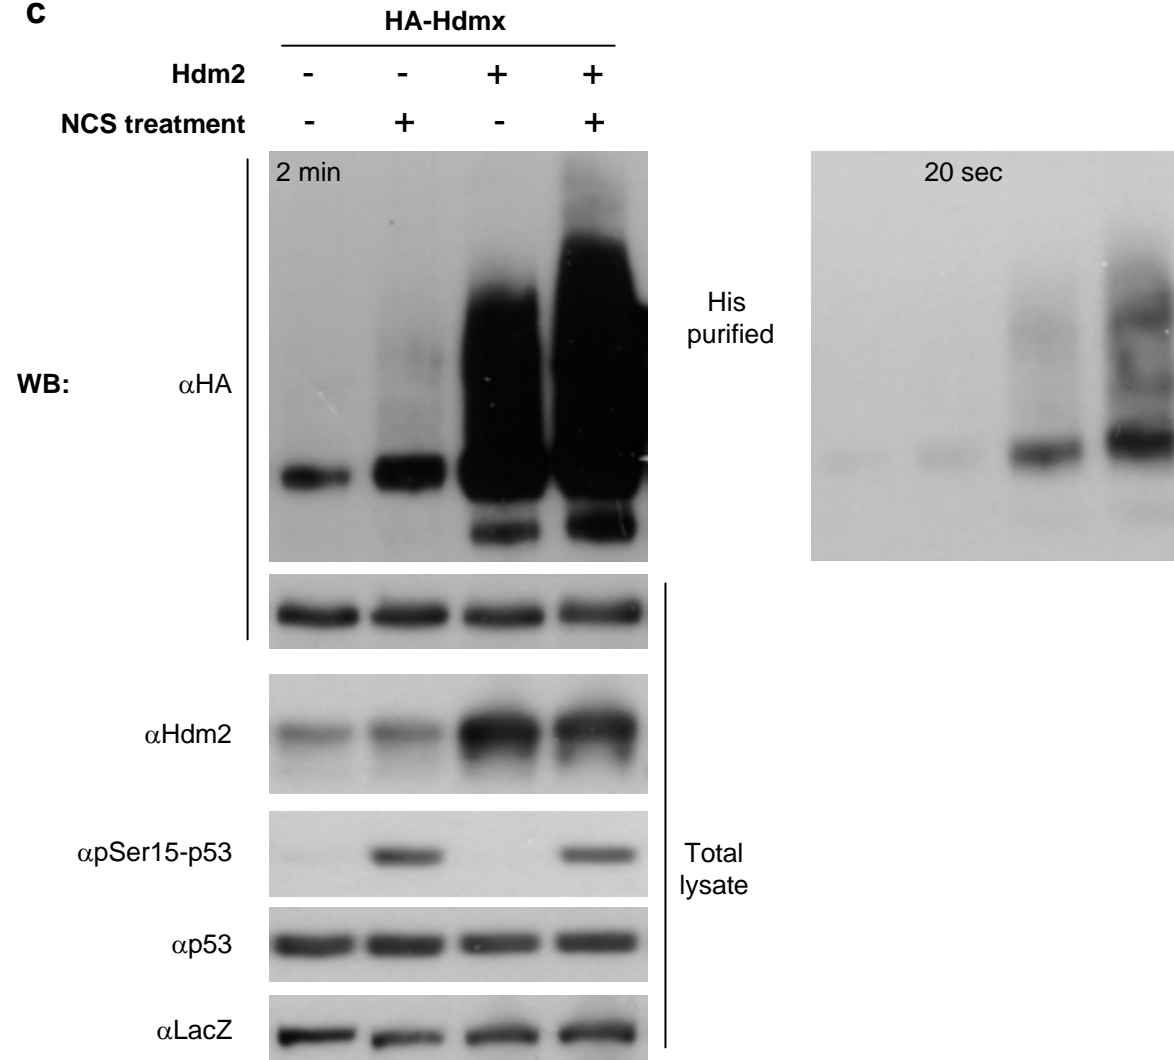

Supplement: pnas_102_14_5056__2.pdf [file pnas_102_14_5056__2.pdf]

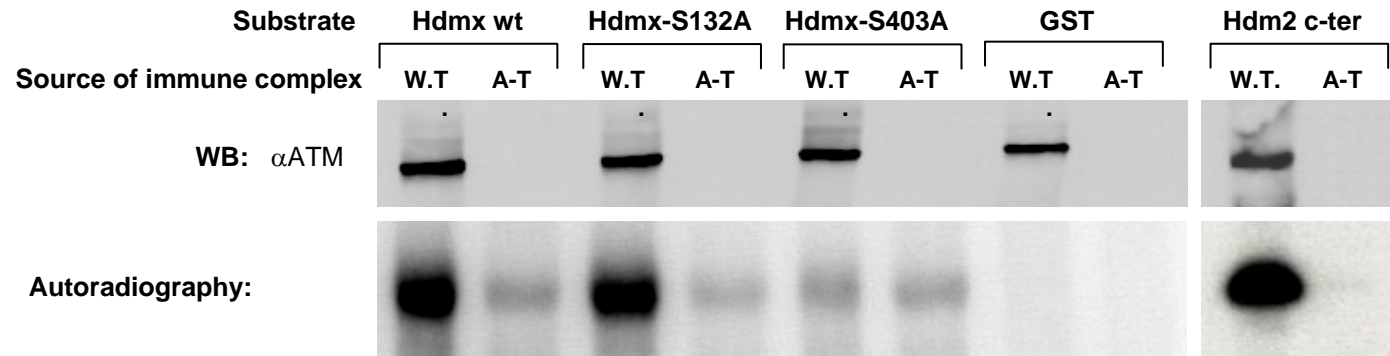

Supplement: pnas_102_14_5056__3.pdf [file pnas_102_14_5056__3.pdf]

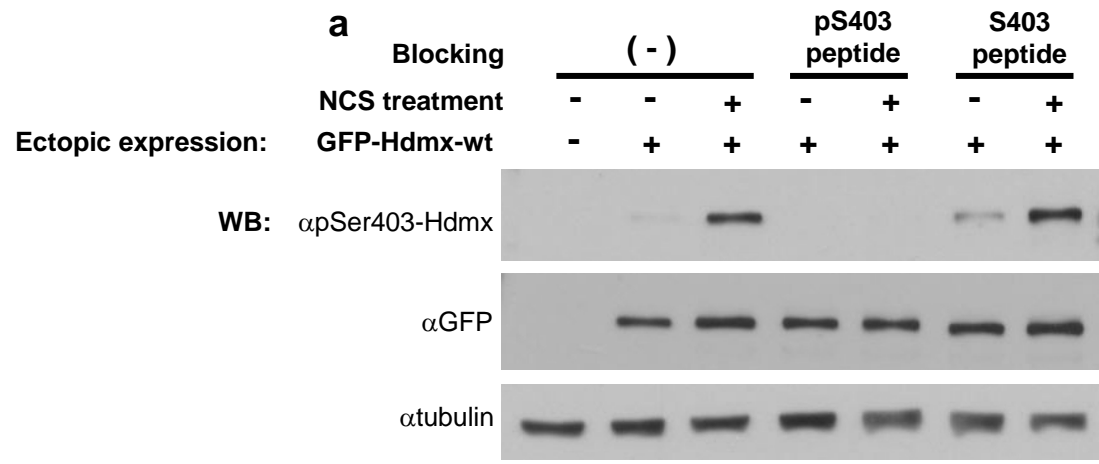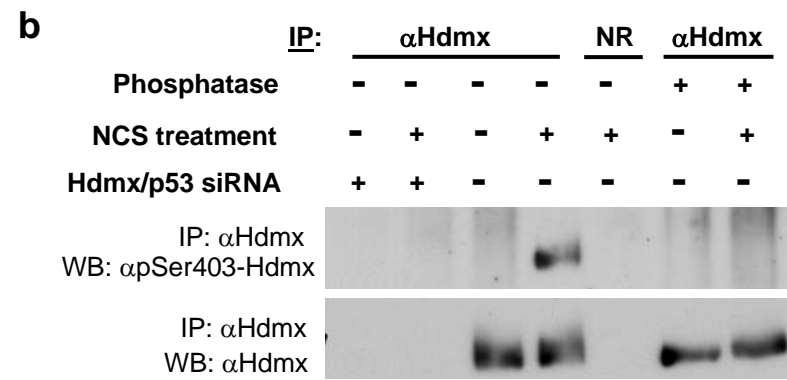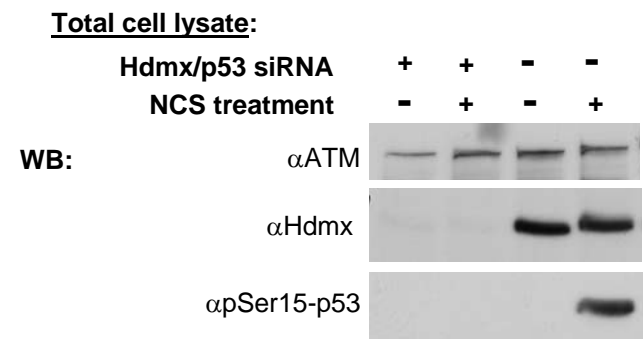

Supplement: pnas_102_14_5056__4.pdf [file pnas_102_14_5056__4.pdf]

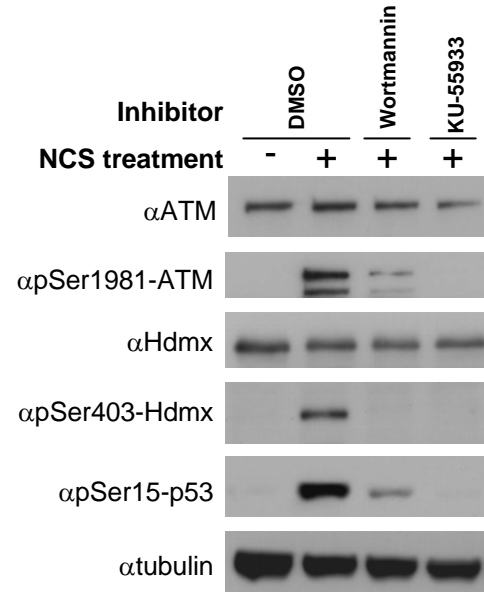

Supplement: pnas_102_14_5056__5.pdf [file pnas_102_14_5056__5.pdf]

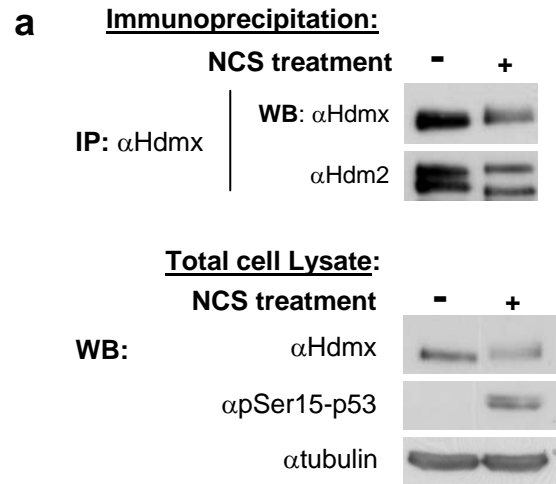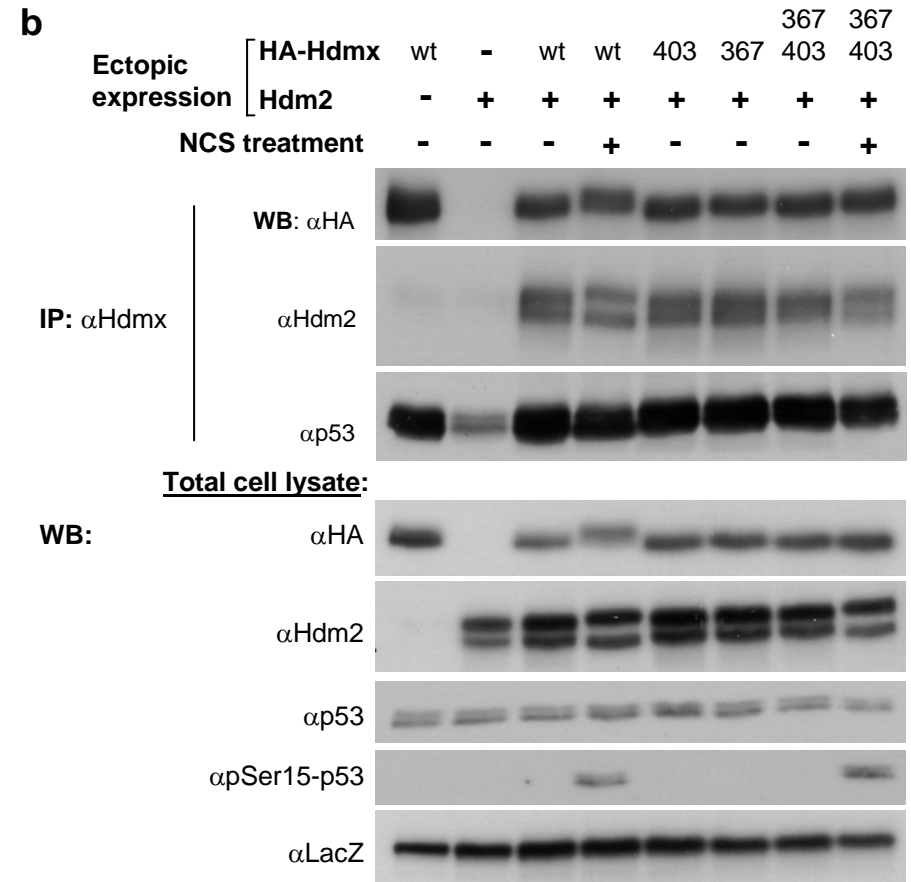

Supplement: pnas_102_14_5056__7.pdf [file pnas_102_14_5056__7.pdf]
